# Supplementary material for: A self-amplifying RNA RSV prefusion-F vaccine elicits potent immunity in pre-exposed and naïve non-human primates
Source: PubMed Central journal article supplement (PMC11564874; doi:10.1038/s41467-024-54289-9), 2024-11-14
Supplement: 41467_2024_54289_MOESM1_ESM.pdf [file 41467_2024_54289_MOESM1_ESM.pdf]

| Material             | Test                     | Assay              | Result            |
|----------------------|--------------------------|--------------------|-------------------|
| saRNA                | Integrity                | Fragment analyzer  | 76% full length   |
|                      | Potency                  | dsRNA launch assay | 95%               |
|                      | Residual protein         | NanoOrange assay   | 3.7E-05 mg/mg RNA |
|                      | Endotoxin                | LAL assay          | <2 EU/mg RNA      |
| LNP formulated saRNA | Size                     | DLS assay          | 75±5 nm           |
|                      | PDI                      | DLS assay          | 0.14              |
|                      | Encapsulation efficiency | Ribogreen assay    | 99%               |
|                      | Endotoxin                | LAL assay          | <2 EU/mg RNA      |

**Supplementary Table 1 | Quality test results of SMARRT.RSV.preF and LNP formulated material.**

| Hallmark gene set                        | FDR    | Analyte     | Linear FC | Adjusted p.value |
|------------------------------------------|--------|-------------|-----------|------------------|
| Interferon Gamma response                | 0.0128 | CCL2        | 3.65      | 3.17E-11         |
|                                          |        | CXCL10      | 9.28      | 2.86E-18         |
|                                          |        | CXCL11      | 8.52      | 3.51E-15         |
|                                          |        | CXCL9       | 2         | 5.06E-04         |
|                                          |        | IL15        | 3.73      | 6.34E-16         |
|                                          |        | IL6         | 11.4      | 1.08E-07         |
|                                          |        | IL7         | 1.18      | 2.72E-01         |
|                                          |        | TNFSF10     | 1.69      | 2.47E-06         |
| Interferon Alpha response                | 0.0324 | CSF1        | 1.53      | 2.01E-08         |
|                                          |        | CXCL10      | 9.28      | 2.86E-18         |
|                                          |        | CXCL11      | 8.52      | 3.51E-15         |
|                                          |        | IL15        | 3.73      | 6.34E-16         |
|                                          |        | IL7         | 1.18      | 2.72E-01         |
| TNF $\alpha$ signaling via NF $\kappa$ B | 0.0372 | OLR1        | 1.02      | 8.76E-01         |
|                                          |        | IL1 $\beta$ | 0.836     | 2.44E-01         |
|                                          |        | IL6         | 11.4      | 1.08E-07         |
|                                          |        | IL18        | 1.64      | 2.68E-04         |
|                                          |        | CXCL10      | 9.28      | 2.86E-18         |
|                                          |        | TNF         | 1.76      | 1.64E-08         |
|                                          |        | VEGFA       | 1.47      | 1.22E-06         |
|                                          |        | CCL2        | 3.65      | 3.17E-11         |
|                                          |        | CSF1        | 1.53      | 2.01E-08         |
|                                          |        | CCL4        | 1.4       | 3.18E-02         |
| CXCL11                                   | 8.52   | 3.51E-15    |           |                  |
| Inflammatory response                    | 0.0372 | OLR1        | 1.02      | 8.76E-01         |
|                                          |        | IL1 $\beta$ | 0.836     | 2.44E-01         |
|                                          |        | IL6         | 11.4      | 1.08E-07         |
|                                          |        | IL18        | 1.64      | 2.68E-04         |
|                                          |        | TNFSF10     | 1.69      | 2.47E-06         |
|                                          |        | CXCL10      | 9.28      | 2.86E-18         |
|                                          |        | IL15        | 3.73      | 6.34E-16         |
|                                          |        | CXCL8       | 1.14      | 3.19E-01         |
|                                          |        | CCL2        | 3.65      | 3.17E-11         |
|                                          |        | OSM         | 1.33      | 8.12E-02         |
|                                          |        | CSF1        | 1.53      | 2.01E-08         |
|                                          |        | CXCL11      | 8.52      | 3.51E-15         |
|                                          |        | LTA         | 1.01      | 8.76E-01         |
| CXCL9                                    | 2      | 5.06E-04    |           |                  |

**Supplementary Table 2 | Biological processes influenced by systemic cytokines/chemokines differentially regulated by immunization with 10mcg of SMARRT.RSV.preF.** Analytes related to biological processes were identified by performing a gene set enrichment analysis using the camera algorithm using the MSigDB Hallmark gene set collection ( $n = 8$  biologically independent animals). Gene sets with false discovery rate (FDR) adjusted p.values $<0.05$  (moderated two-sided t-statistics) are shown. Analytes that are part of each gene set are shown. For each analyte the estimated mean fold change (on a linear scale) and associated adjusted p.value (two-sided moderated t-test) as obtained from fitting a linear model with time (pre- to post- immunization) as factor is also shown.

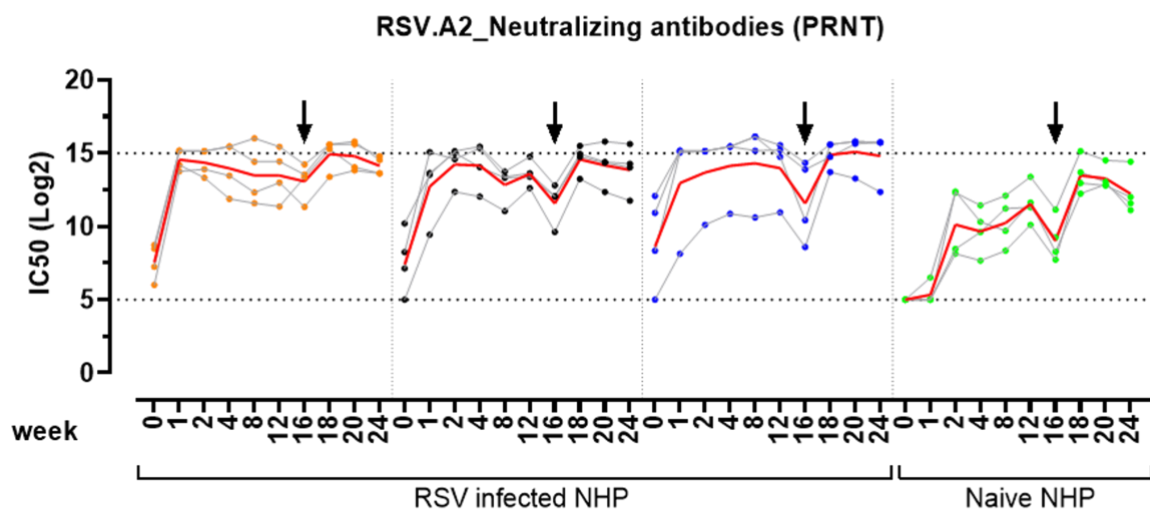

| Legend | 1 <sup>st</sup> dose (week 0) |            | Booster (week 16) |            |
|--------|-------------------------------|------------|-------------------|------------|
|        | Vaccine                       | Dose (mcg) | Vaccine           | Dose (mcg) |
| ●      | PRPM                          | 50         | PRPM              | 50         |
| ●      | SMARRT.RSV.preF               | 1          | SMARRT.RSV.preF   | 1          |
| ●      | SMARRT.RSV.preF               | 10         | SMARRT.RSV.preF   | 1          |
| ●      | SMARRT.RSV.preF               | 10         | SMARRT.RSV.preF   | 1          |

**Supplementary Fig. 1 | RSV.A2 PRNT measured in the serum of immunized animals.** Lower and upper limit of quantification indicated by the dotted lines. Individual animals ( $n = 4$ /group) are represented by the dots color coded according to treatment with geometric mean response by the red line. Animals were boosted at week 16 indicated by the down arrow. No statistical analysis was done since the majority of RSV pre-exposed animals had PRNT at ULoQ.

## RSV.F specific memory T-cells

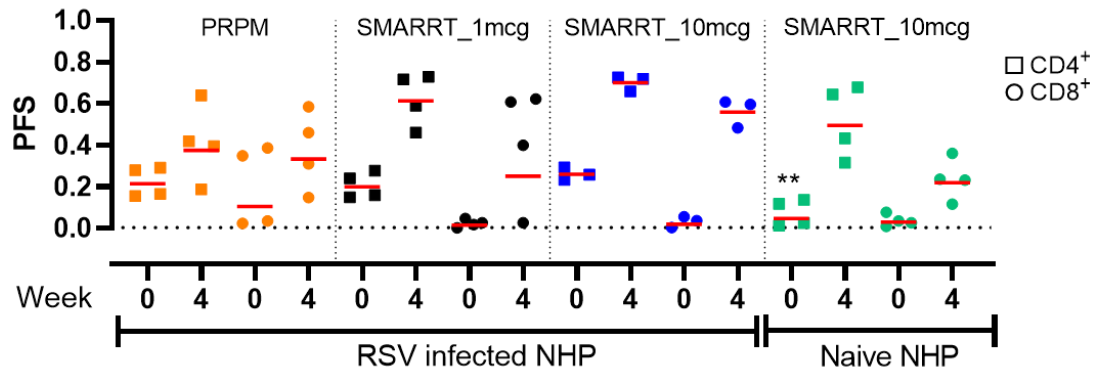

**Supplementary Fig. 2 | COMPASS polyfunctionality score (PFS) for RSV.F specific memory CD4 (squares) and CD8 (circles) T-cells** were determined at week 0 (pre-immunization) and at week 4 ( $n = 4$ /group). Due to insufficient number of cells, data from an RSV pre-exposed animal immunized with 10mcg SMARRT.RSV.preF group is not available. Statistical significance for CD4 and CD8 PFS was estimated with ANOVA by comparing the response between SMARRT immunized groups at weeks 0 and at week 4. \*\*  $p < 0.01$ .

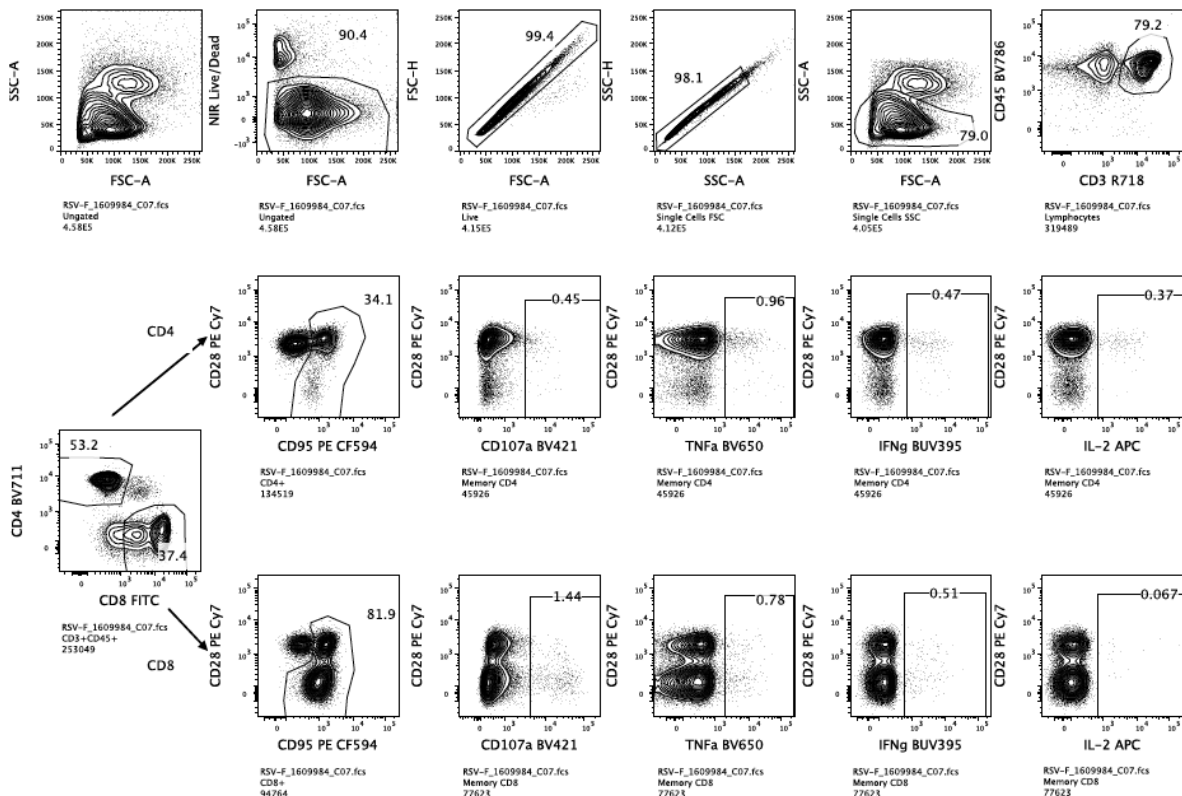

**Supplementary Fig. 3 | Gating strategy for intracellular cytokine staining of PBMCs from NHPs.**

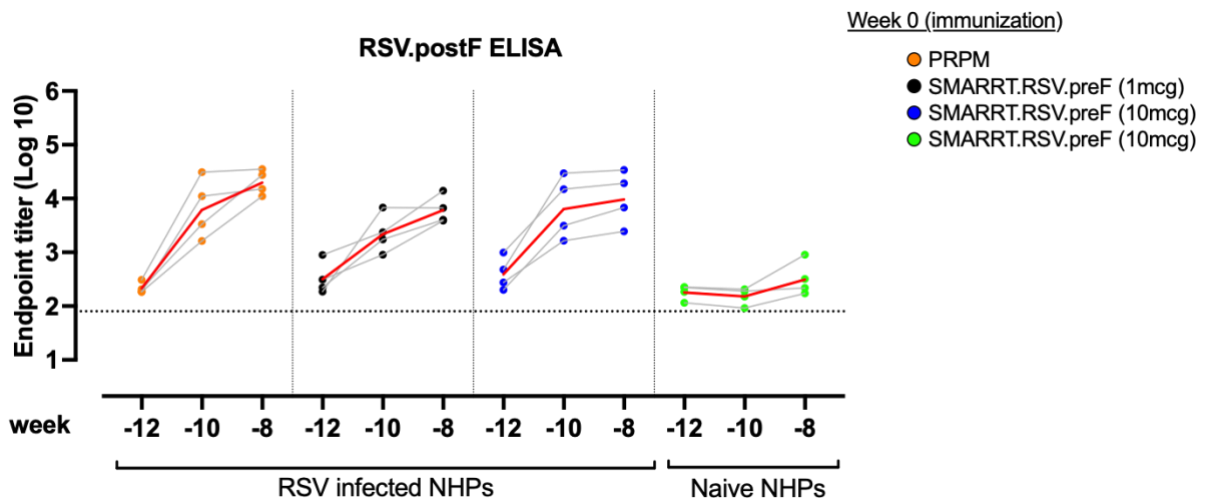

**Supplementary Fig. 4 | Binding antibody titers specific to RSV post-F protein** were measured in the serum of NHPs following RSV infection at week -12. The figure displays the temporal kinetics of antibody titers in RSV infected animals ( $n = 12$ ) that were distributed into three groups ( $n = 4$ /group). A naïve group ( $n = 4$ ) was not infected with RSV (green). The limit of detection (LoD) is represented by the dotted line, and the geometric mean response is shown by the red line. The animals in respective groups were immunized with vaccines at week 0.
